# Supplementary material for: Isolation and identification of the marine diatom Entomoneis sp. MMOGRB 0374S (Bacillariophyta): a strain with high arachidonic acid composition
Source: publisher site journal article supplement (doi:10.1515/bot-2016-0024), 2016-01-01
Supplement: Supplementary file 1 [file bot-2016-0024_suppl.zip]

**Supplemental material**

**Isolation and identification of marine diatom Entomoneis sp. MMOGRB 0374S (Bacillariophyta): a strain with high arachidonic acid composition**

Lijuan He, Sulin Lou, Xiangzhi Lin, Xueqiao Qian, Shouqi Xie and Zhaokai Wang

DOI 10.1515/bot-2016-0024

**Supplemental Table 1:** Examples of unique variations in the 18S rDNA sequence among *Entomoneis* sp. MMOGRB 0374S and other species and strains of *Entomoneis*.

| **Taxa** | **135-142** | **220-228** | **589-626** | **650-654** | **1356-1357** |
| --- | --- | --- | --- | --- | --- |
| *E*. sp. MMOGRB 0374S  *E. alata*  *E. alata* P540  *E. alata* CCAP1003/3  *E. ornata*  *E. paludosa v.hyalina*  *E. paludosa*  *E. punctulata*  *E*. sp. cs782  *E*. sp. CCMP2396  *E*. sp. CCMP1693 | CGCTCGCG  - - - CATTT  - - - CATT -  - - - CATCT  - - - CATCT  - - - CATTT  - - - CAT- T  - - - CATTT  - - - CATTT  - - - CATCT  - - - CATTT | ATTTTTTCT  - - CTTGTCC  - - CTTGTCC  - - CTTGTCC  - - CTCGTCC  - - - TTTACC  - - CTCGTCC  - - TTTTACC  - - CTCTGCC  - - CTTGTCC  - - CTCGTCC | TTCCCCCGCG GGCCCTCAGT TAATTGCAGG G- CCCACC  C- TCGTCCGT GATGTCC- - - TTTTAGG- TA C- GTTCAT  T- GTACCCCT GATGTCC- - - - TTTTTGGTA C- GTTTGG  C- TTGTTCAC GATGTCC- - - - TTTTTGGTA C- GTTCGT  C- GTGCCCTC GATGTCC- - - - TTTTTGGTA C- GTTCGG  T- GTGGTCCA GATGTCC- - - - TTTTAGGTA C- GTTCTG  C- GTGCCCCT GATGTCC- - - - TTTTTGGTA C- GTTTGG  T- GCGGCCTA GATGTCC- - - TTTTTAGGTG C- GTTCTG  CCGTGTCCCT GATGTCC- AT TTTCTTGGTA C- GTTTGG  C- GCGTCTCT GATGTCC- - - - TTTTTGGTA C- GTTCGG  C- GTCCCGCC GATGTCC- - - - TTTTTGGTA C- GTTTGG | TCCGC  CCTGT  CCTGT  CCTGT  CCTGT  CTTGT  CCTGT  CCTGT  CCTGT  CCTGT  CCTGT | TT  AC  AC  AC  AC  AC  AC  AC  AC  AC  AC |

**Supplemental Figure 1:** (A) Gas chromatograph analysis of the fatty acid methyl esters prepared from total lipids of *Entomoneis* sp. MMOGRB 0374S without methyl arachidonate as an internal standard; (B) Gas chromatograph analysis of the fatty acid methyl esters prepared from total lipids of *Entomoneis* sp. MMOGRB 0374S with methyl arachidonate as an internal standard.
